# Supplementary material for: Programming Local Confinements in Crystalline Frameworks through Reticular Chemistry
Source: Research Square preprint supplement (doi:10.21203/rs.3.rs-8090759/v1), 2025-12-01

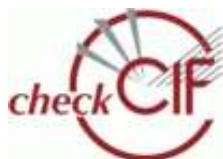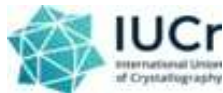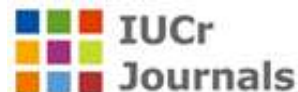

## checkCIF/PLATON report

You have not supplied any structure factors. As a result the full set of tests cannot be run.

THIS REPORT IS FOR GUIDANCE ONLY. IF USED AS PART OF A REVIEW PROCEDURE FOR PUBLICATION, IT SHOULD NOT REPLACE THE EXPERTISE OF AN EXPERIENCED CRYSTALLOGRAPHIC REFEREE.

No syntax errors found.      CIF dictionary      Interpreting this report

### Datablock: xt8018-c-1-13

---

|                 |                                      |                                    |                    |
|-----------------|--------------------------------------|------------------------------------|--------------------|
| Bond precision: | C-C = 0.0329 Å                       |                                    | Wavelength=0.02510 |
| Cell:           | a=22.461 (5)                         | b=22.461 (5)                       | c=22.461 (5)       |
|                 | alpha=90                             | beta=90                            | gamma=90           |
| Temperature:    | 293 K                                |                                    |                    |
|                 | Calculated                           | Reported                           |                    |
| Volume          | 11332 (8)                            | 11331 (8)                          |                    |
| Space group     | P m -3 n                             | P m -3 n                           |                    |
| Hall group      | -P 4n 2 3                            | -P 4n 2 3                          |                    |
| Moiety formula  | C98 H38 Cl12 N54 Zn15 [+<br>solvent] | C98 H38 Cl12 N54 Zn15,<br>12[CH4O] |                    |
| Sum formula     | C98 H38 Cl12 N54 Zn15 [+<br>solvent] | C110 H86 Cl12 N54 O12 Zn15         |                    |
| Mr              | 3378.07                              | 3762.55                            |                    |
| Dx, g cm-3      | 0.990                                | 1.103                              |                    |
| Z               | 2                                    | 2                                  |                    |
| Mu (mm-1)       | 0.000                                | 0.000                              |                    |
| F000            | 0.0                                  | 1228.0                             |                    |
| F000'           | 3314.83                              |                                    |                    |
| h, k, lmax      | 18, 18, 18                           | 18, 18, 18                         |                    |
| Nref            | 653                                  | 652                                |                    |
| Tmin, Tmax      |                                      |                                    |                    |
| Tmin'           |                                      |                                    |                    |

Correction method= Not given

Data completeness= 0.998

Theta(max)= 0.599

R(reflections)= 0.1230( 287)

wR2(reflections)=  
0.4373( 652)

S = 1.049

Npar= 79

---

The following ALERTS were generated. Each ALERT has the format

**test-name\_ALERT\_alert-type\_alert-level.**

Click on the hyperlinks for more details of the test.

---

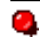

#### Alert level A

RINTA01\_ALERT\_3\_A The value of Rint is greater than 0.25  
Rint given 0.880

#### Author Response: Powder crystal collected by Micro-ED

THETM01\_ALERT\_3\_A The value of sine(theta\_max)/wavelength is less than 0.550  
Calculated sin(theta\_max)/wavelength = 0.4165

#### Author Response: The diffraction of powder crystal was weak at high angles.

PLAT020\_ALERT\_3\_A The Value of Rint is Greater Than 0.12 ..... 0.880 Report

#### Author Response: Powder crystal collected by Micro-ED

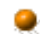

#### Alert level B

PLAT084\_ALERT\_3\_B High wR2 Value (i.e. > 0.25) ..... 0.44 Report  
PLAT341\_ALERT\_3\_B Low Bond Precision on C-C Bonds ..... 0.03286 Ang.

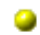

#### Alert level C

PLAT026\_ALERT\_3\_C Ratio Observed / Unique Reflections (too) Low .. 44% Check  
PLAT082\_ALERT\_2\_C High R1 Value ..... 0.12 Report  
PLAT088\_ALERT\_3\_C Poor Data / Parameter Ratio ..... 8.27 Note  
PLAT241\_ALERT\_2\_C High 'MainMol' Ueq as Compared to Neighbors of C005 Check  
PLAT242\_ALERT\_2\_C Low 'MainMol' Ueq as Compared to Neighbors of Zn1 Check  
PLAT242\_ALERT\_2\_C Low 'MainMol' Ueq as Compared to Neighbors of N004 Check

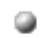

#### Alert level G

FORMU01\_ALERT\_2\_G There is a discrepancy between the atom counts in the  
\_chemical\_formula\_sum and the formula from the \_atom\_site\* data.  
Atom count from \_chemical\_formula\_sum: C110 H86 Cl12 N54 O12 Zn15  
Atom count from the \_atom\_site data: C98 H38 Cl12 N54 Zn15

ABSMU01\_ALERT\_1\_G Calculation of \_exptl\_absorpt\_correction\_mu  
not performed for this radiation type.

CELLZ01\_ALERT\_1\_G Difference between formula and atom\_site contents detected.

CELLZ01\_ALERT\_1\_G ALERT: Large difference may be due to a  
symmetry error - see SYMMG tests  
From the CIF: \_cell\_formula\_units\_Z 2  
From the CIF: \_chemical\_formula\_sum C110 H86 Cl12 N54 O12 Zn15  
TEST: Compare cell contents of formula and atom\_site data

| atom | Z*formula | cif sites | diff  |
|------|-----------|-----------|-------|
| C    | 220.00    | 196.00    | 24.00 |
| H    | 172.00    | 76.00     | 96.00 |
| Cl   | 24.00     | 24.00     | 0.00  |
| N    | 108.00    | 108.00    | 0.00  |
| O    | 24.00     | 0.00      | 24.00 |
| Zn   | 30.00     | 30.00     | 0.00  |

PLAT004\_ALERT\_5\_G Polymeric Structure Found with Maximum Dimension 3 Info

PLAT041\_ALERT\_1\_G Calc. and Reported SumFormula Strings Differ Please Check  
Calc: C98 H38 Cl12 N54 Zn15  
Rep.: C110 H86 Cl12 N54 O12 Zn15

PLAT042\_ALERT\_1\_G Calc. and Reported MoietyFormula Strings Differ Please Check  
Calc: C98 H38 Cl12 N54 Zn15  
Rep.: C98 H38 Cl12 N54 Zn15, 12[CH40]

PLAT072\_ALERT\_2\_G SHELXL First Parameter in WGHT Unusually Large 0.16 Report

PLAT083\_ALERT\_2\_G SHELXL Second Parameter in WGHT Unusually Large 14.97 Why ?

PLAT187\_ALERT\_4\_G The CIF-Embedded .res File Contains RIGU Records 1 Report

PLAT190\_ALERT\_3\_G A Non-default RIGU Restraint Value for First Par 0.0010 Report

PLAT190\_ALERT\_3\_G A Non-default RIGU Restraint Value for SecondPar 0.0010 Report

PLAT199\_ALERT\_1\_G Reported \_cell\_measurement\_temperature ..... (K) 293 Check

PLAT200\_ALERT\_1\_G Reported \_diffn\_ambient\_temperature ..... (K) 293 Check

PLAT432\_ALERT\_2\_G Short Inter X...Y Contact C005 ..C00D . 2.49 Ang.  
 $-1/2+z, 1/2-y, 1/2+x = 22\_455$  Check

PLAT432\_ALERT\_2\_G Short Inter X...Y Contact C005 ..C005 . 2.87 Ang.  
 $1/2-y, 1/2-x, 3/2-z = 14\_556$  Check

PLAT432\_ALERT\_2\_G Short Inter X...Y Contact C005 ..C005 . 2.98 Ang.  
 $1/2-x, -1/2+z, 1/2+y = 18\_545$  Check

PLAT432\_ALERT\_2\_G Short Inter X...Y Contact C00D ..C00D . 2.58 Ang.  
 $-1/2+z, 1/2-y, 1/2+x = 22\_455$  Check

PLAT606\_ALERT\_4\_G Solvent Accessible VOID(S) in Crystal Structure ! Info

PLAT720\_ALERT\_4\_G Number of Unusual/Non-Standard Labels ..... 15 Note

|      |      |      |      |      |      |      |      |
|------|------|------|------|------|------|------|------|
| Zn00 | Cl00 | N004 | C005 | N006 | C007 | N008 | C009 |
| H009 | C00A | N00B | C00C | H00C | C00D | H00D |      |

PLAT768\_ALERT\_4\_G RES Embedded Explicitly Supplied Scattering Data 6 Note

PLAT794\_ALERT\_5\_G Tentative Bond Valency for Zn1 (II) . 1.82 Info

PLAT794\_ALERT\_5\_G Tentative Bond Valency for Zn00 (II) . 2.06 Info

PLAT802\_ALERT\_4\_G CIF Input Record(s) with more than 80 Characters 1 Info

PLAT860\_ALERT\_3\_G Number of Least-Squares Restraints ..... 87 Note

PLAT868\_ALERT\_4\_G ALERTS Due to the Use of \_smtbx\_masks Suppressed ! Info

PLAT948\_ALERT\_5\_G Externally Supplied Scattering Factors RES 6 Note

---

3 **ALERT level A** = Most likely a serious problem - resolve or explain  
2 **ALERT level B** = A potentially serious problem, consider carefully  
6 **ALERT level C** = Check. Ensure it is not caused by an omission or oversight  
27 **ALERT level G** = General information/check it is not something unexpected

7 ALERT type 1 CIF construction/syntax error, inconsistent or missing data

11 ALERT type 2 Indicator that the structure model may be wrong or deficient  
10 ALERT type 3 Indicator that the structure quality may be low  
6 ALERT type 4 Improvement, methodology, query or suggestion  
4 ALERT type 5 Informative message, check

---

It is advisable to attempt to resolve as many as possible of the alerts in all categories. Often the minor alerts point to easily fixed oversights, errors and omissions in your CIF or refinement strategy, so attention to these fine details can be worthwhile. It is up to the individual to critically assess their own results and, if necessary, seek expert advice.

### Validation response form

Please find below a validation response form (VRF) that can be filled in and pasted into your CIF.

```
# start Validation Reply Form
_vrf_PLAT084_xt8018-c-1-13
;
PROBLEM: High wR2 Value (i.e. > 0.25) ..... 0.44 Report
RESPONSE: ...
;
_vrf_PLAT341_xt8018-c-1-13
;
PROBLEM: Low Bond Precision on C-C Bonds ..... 0.03286 Ang.
RESPONSE: ...
;
# end Validation Reply Form
```

---

**PLATON version of 17/09/2025; check.def file version of 17/09/2025**

---

## duplicate check

**No duplication found**

---

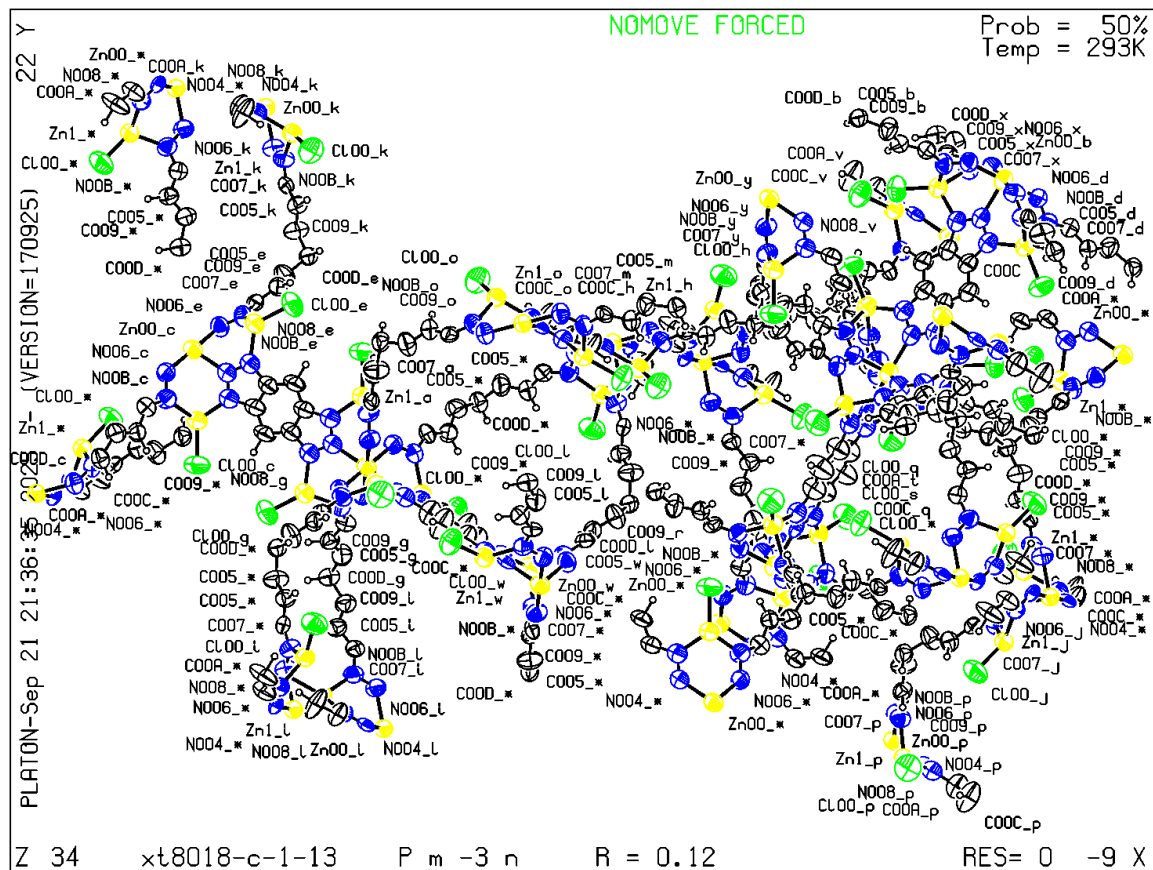

Supplement: Supplementary file 1 [file 2725197f7c02f7f7dea34461.pdf]
